# Supplementary material for: Effectiveness of implementing a preventive urinary catheter care bundle in hip fracture patients
Source: PubMed Central journal article supplement (PMC8941588; doi:10.1177/17571774211060417), 2022-02-15
Supplement: sj-pdf-2-bji-10.1177_17571774211060417.pdf [file sj-pdf-2-bji-10.1177_17571774211060417.pdf]

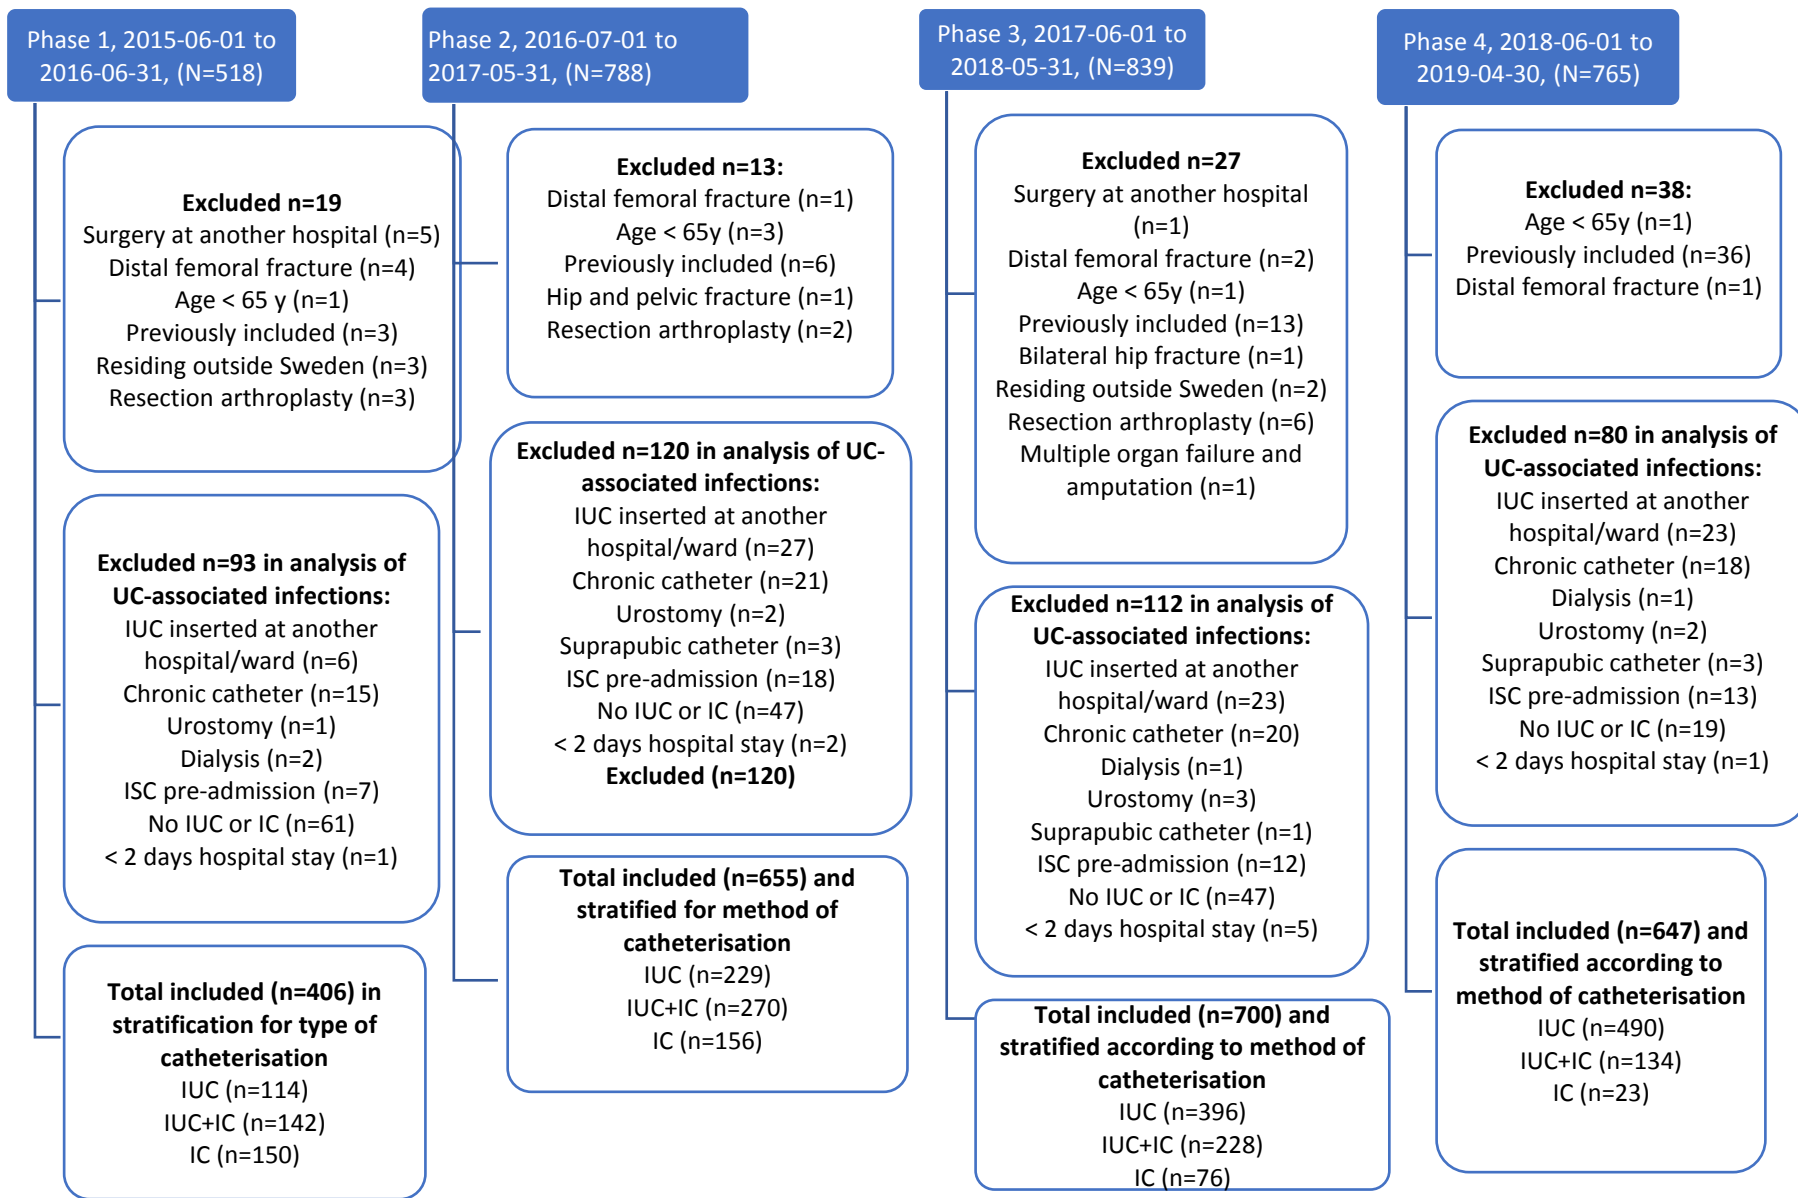

**Figure 1** Flowchart of included and excluded patients

Abbreviations: urinary catheter = UC, indwelling urinary catheter = IUC, intermittent catheterisation = IC, intermittent self-catheterisation = ISC
