# Supplementary material for: Effectiveness of implementing a preventive urinary catheter care bundle in hip fracture patients
Source: PubMed Central journal article supplement (PMC8941588; doi:10.1177/17571774211060417), 2022-02-15
Supplement: sj-pdf-4-bji-10.1177_17571774211060417.pdf [file sj-pdf-4-bji-10.1177_17571774211060417.pdf]

**Table 3. Location of indwelling catheter insertion, N=2,003, Phases 1-4**

| <b>Location</b>                | <b>Phase 1</b> | <b>Phase 2</b> | <b>Phase 3</b> | <b>Phase 4</b> |
|--------------------------------|----------------|----------------|----------------|----------------|
|                                | n=256          | n=499          | n=624*         | n=624          |
| <i>Emergency room</i>          | 41 (16.0)      | 85 (17.0)      | 122 (19.5)     | 211 (33.8)     |
| <i>Ortho-geriatric ward</i>    | 61 (23.8)      | 90 (18.0)      | 174 (27.8)     | 198 (31.7)     |
| <i>Operating room</i>          | 107 (41.7)     | 219 (43.8)     | 203 (32.5)     | 140 (22.4)     |
| <i>Post-operative ward</i>     | 16 (0.06)      | 26 (0.05)      | 14 (0.02)      | 7 (0.01)       |
| <i>Inserted more than once</i> | 31 (12.1)      | 79 (15.8)      | 110 (17.6)     | 68 (10.8)      |

*n= numbers (%). \*Missing value for one patient*
