# Supplementary material for: Effectiveness of implementing a preventive urinary catheter care bundle in hip fracture patients
Source: PubMed Central journal article supplement (PMC8941588; doi:10.1177/17571774211060417), 2022-02-15
Supplement: sj-pdf-5-bji-10.1177_17571774211060417.pdf [file sj-pdf-5-bji-10.1177_17571774211060417.pdf]

**Table 4. Univariable analyses of UC-associated infections for the patients with an acute hip fracture, N= 2 408**

| Variable                        |                                                               | n (%)       | OR* (95% CI)        | p-value | Area under ROC curve (95%CI) |
|---------------------------------|---------------------------------------------------------------|-------------|---------------------|---------|------------------------------|
| Phases (1-4) <sup>1</sup>       | Phase 1                                                       | 75 (18.5)   | 1.0                 | 0.008   | 0.66 (0.62-0.69)             |
|                                 | Phase 2                                                       | 82 (12.5)   | 0.63<br>(0.45-0.89) |         |                              |
|                                 | Phase 3                                                       | 50 (7.1)    | 0.34<br>(0.23-0.50) |         |                              |
|                                 | Phase 4                                                       | 27 (4.2)    | 0.19<br>(0.12-0.30) |         |                              |
| Age*                            | 65-<82                                                        | 66 (7.8%)   | 1.02<br>(1.00-1.04) | 0.015   | 0.55 (0.51-0.59)             |
|                                 | 82-<89                                                        | 78 (10.0%)  |                     |         |                              |
|                                 | 89-102                                                        | 90 (11.5%)  |                     |         |                              |
| Gender                          | Female                                                        | 164 (9.6%)  | 1.03<br>(0.77-1.39) | 0.83    | 0.50 (0.47-0.53)             |
|                                 | Male                                                          | 70 (9.9%)   |                     |         |                              |
| ASA score*                      | I-II                                                          | 94 (9.2%)   | 1.11<br>(0.84-1.46) | 0.45    | 0.51 (0.48-0.55)             |
|                                 | III-IV                                                        | 140 (10.1%) |                     |         |                              |
| Diabetes                        | Yes                                                           | 33 (9.0%)   | 1.11<br>(0.75-1.63) | 0.61    | 0.51 (0.48-0.53)             |
|                                 | No                                                            | 201 (9.8%)  |                     |         |                              |
| Hospital length of stay (days)* | 3>6                                                           | 7 (2.8%)    | 1.07<br>(1.05-1.08) | <0.0001 | 0.66 (0.62-0.70)             |
|                                 | 6<15                                                          | 112 (7.7%)  |                     |         |                              |
|                                 | 15-68                                                         | 115 (16.3%) |                     |         |                              |
| Catheterisation treatment       | Indwelling urinary catheter                                   | 74 (6.0%)   | 0.41<br>(0.31-0.54) | <0.0001 | 0.61 (0.58-0.64)             |
|                                 | Indwelling urinary catheter +<br>intermittent catheterisation | 112 (14.5%) | 2.10<br>(1.60-2.75) | <0.0001 | 0.59 (0.55-0.62)             |
|                                 | Intermittent catheterisation                                  | 48 (11.9%)  | 1.31<br>(0.94-1.84) | 0.11    | 0.52 (0.49-0.55)             |
| Urinary catheter days*          | 0.50-<2.50                                                    | 66 (8.2%)   |                     |         |                              |
|                                 | 2.50-<5.00                                                    | 45 (7.3%)   |                     |         |                              |

|                                               |            |             |                     |         |                  |
|-----------------------------------------------|------------|-------------|---------------------|---------|------------------|
|                                               | 5.00-48.00 | 75 (12.8%)  | 1.07<br>(1.04-1.10) | <0.0001 | 0.57 (0.53-0.62) |
| Indwelling urinary catheter reinsertion       | No         | 140 (8.2%)  |                     |         |                  |
|                                               | Yes        | 46 (16.0%)  | 2.15<br>(1.50-3.08) | <0.0001 | 0.56 (0.53-0.59) |
| Intermittent catheterisation number of times* | 0          | 74 (6.0%)   |                     |         |                  |
|                                               | 1-3        | 109 (11.6%) |                     |         |                  |
|                                               | 4-5        | 26 (19.7%)  |                     |         |                  |
|                                               | 6-10       | 16 (17.6%)  |                     |         |                  |
|                                               | 11-15      | 6 (46.2%)   |                     |         |                  |
|                                               | 16-20      | 1 (50.0%)   |                     |         |                  |
|                                               | 21-25      | 2 (100.0%)  | 1.73<br>(1.51-1.98) | <0.0001 | 0.63 (0.59-0.67) |

\*Odds ratios were calculated on the underlying continuous variables.

<sup>1</sup> Phase 1 works as a reference analysis of phases 2-4.
